# Supplementary material
Source: Springer Nature journal article supplement (https://www.springermedizin.de/resource/supplementary/12950_2012_282_MOESM5_ESM.pdf/9557474)

**REG3A (PAP)**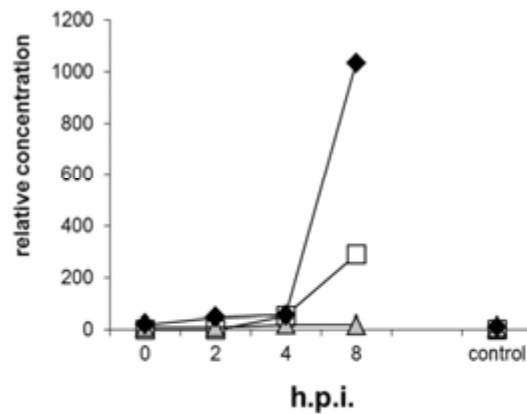**IL8**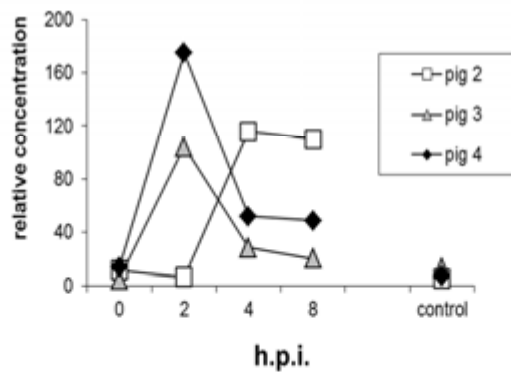**IL1B**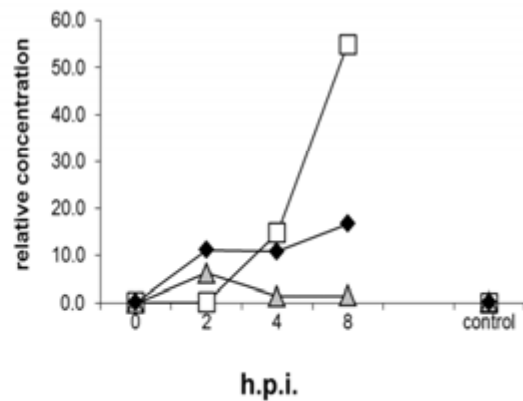**NFBK1A**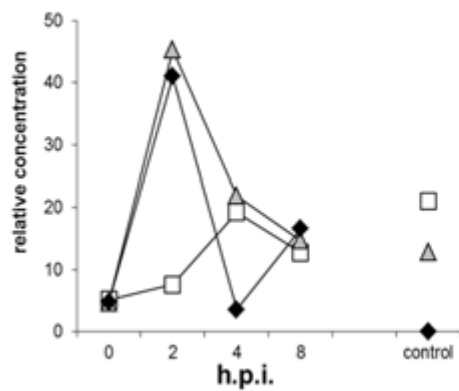**MMP1**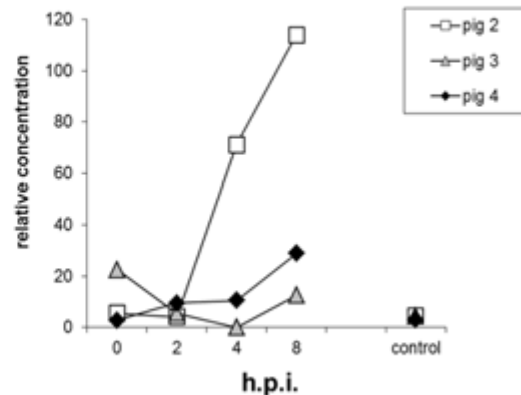**TIMP1**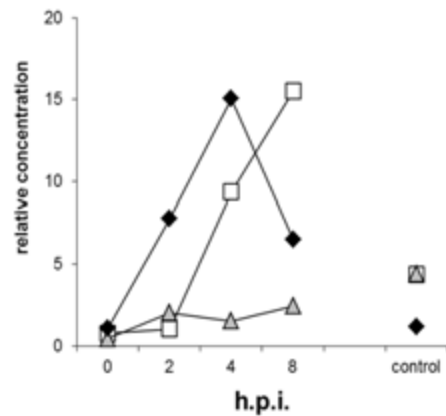

Supplement: MOESM5 [file 9557474]
